# Supplementary material for: Simultaneous structural and elemental nano-imaging of human brain tissue
Source: PubMed Central journal article supplement (PMC8163372; doi:10.1039/d0sc02844d), 2020-08-10
Supplement: SC-011-D0SC02844D-s001.pdf [file SC-011-D0SC02844D-s001.pdf]

## Electronic Supplementary Information

### Simultaneous Structural and Elemental Nano-Imaging of Human Brain Tissue

*Sian Genoud, Michael W.M. Jones, Benjamin G. Trist, Junjing Deng, Si Chen, Dominic J. Hare, and Kay L. Double\**

\* [kay.double@sydney.edu.au](mailto:kay.double@sydney.edu.au) and [dominic.hare@unimelb.edu.au](mailto:dominic.hare@unimelb.edu.au)

#### Table of Contents

|                                                                                                                                   |          |
|-----------------------------------------------------------------------------------------------------------------------------------|----------|
| <b>List of Abbreviations</b> .....                                                                                                | <b>2</b> |
| <b>Supplementary Data</b> .....                                                                                                   | <b>3</b> |
| <b>Supplementary Figures</b> .....                                                                                                | <b>4</b> |
| Supplementary Fig. 1. Elemental maps of LB, SOD1 aggregate and neuromelanin in the PD brain.....                                  | 4        |
| Supplementary Fig. 2. Bionanoprobe schematic .....                                                                                | 4        |
| Supplementary Fig. 3. Structure and dimensions of protein aggregates and neuromelanin .....                                       | 5        |
| <b>Supplementary Tables</b> .....                                                                                                 | <b>6</b> |
| Supplementary Table 1. Subject demographics.....                                                                                  | 6        |
| Supplementary Table 2. APS Bionanoprobe scan identifiers .....                                                                    | 6        |
| Supplementary Table 3. X-ray ptychography and fluorescent emission characteristics of human Parkinson's disease brain tissue..... | 7        |
| <b>Supplementary References</b> .....                                                                                             | <b>8</b> |

## List of Abbreviations

|               |                                   |
|---------------|-----------------------------------|
| $\alpha$ -syn | $\alpha$ -synuclein               |
| $A_{mass}$    | areal mass                        |
| APS           | Advanced Photon Source            |
| ALS           | amyotrophic lateral sclerosis     |
| B8H10         | misfolded human SOD1, clone B8H10 |
| CCS           | copper chaperone for SOD1         |
| LB            | Lewy body                         |
| LOD           | limit of detection                |
| NM            | neuromelanin                      |
| NP            | neuropil                          |
| PD            | Parkinson's disease               |
| PDBe          | Protein Data Bank in Europe       |
| pS129         | phospho serine129                 |
| rad           | radians                           |
| SD            | standard deviation                |
| SEM           | standard error of the mean        |
| $Si_3N_4$     | silicon nitride                   |
| SOD1          | superoxide dismutase 1            |
| SN            | substantia nigra                  |
| XFM           | X-ray fluorescence microscopy     |

## Supplementary Data

Complete raw image data files can be accessed via [PDIImagingDataset.zip](#) (private link). See Supplementary Table 2 for sample key.

## Supplementary Figures

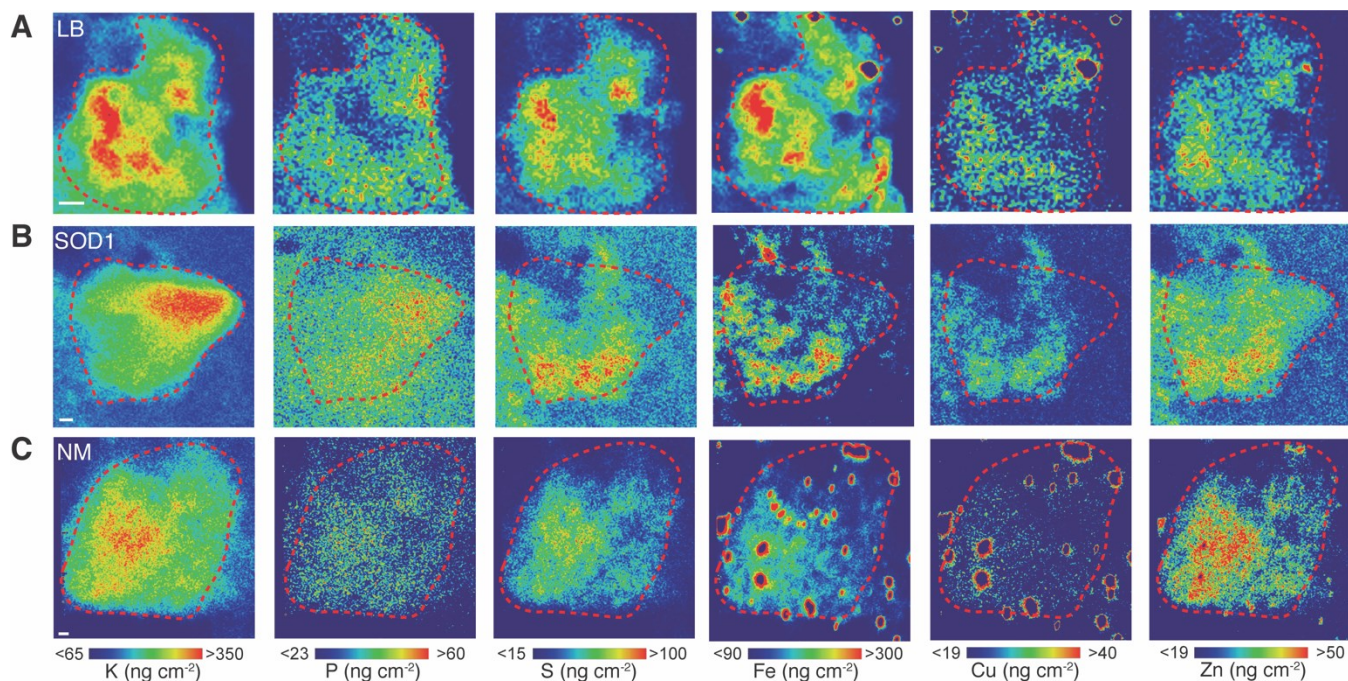

### Supplementary Fig. 1. Elemental maps of LB, SOD1 aggregate and neuromelanin in the PD brain

XFM corresponding to immunohistochemistry and nanostructure images in Figure 1 of the main text. Representative elemental maps for A) LB B) SOD1 aggregate and C) neuromelanin of the six key elements K, P, S, Fe, Cu and Zn. Scale bars =  $1\mu\text{m}$ . Representative images from scan IDs fly6 (LB), fly96 (SOD1) and fly67 (NM).

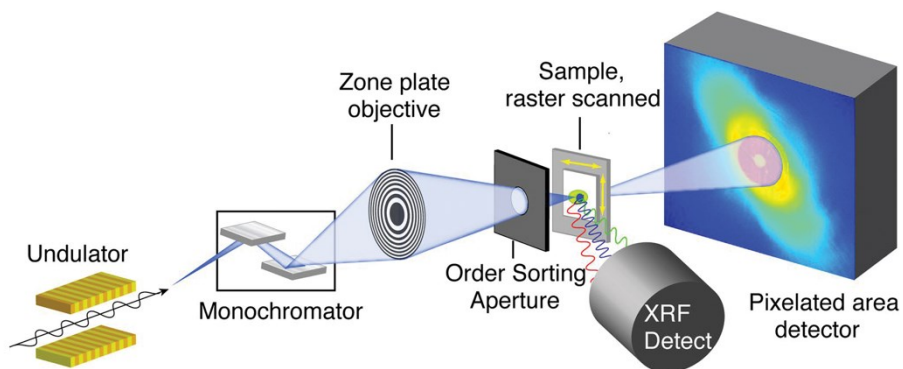

### Supplementary Fig. 2. Bionanoprobe schematic

Schematic of the X-ray fluorescence and ptychographic imaging at the Bionanoprobe of the Advanced Photon Source. Reproduced from Deng et al (reproduced per Creative Commons Attribution 4.0 International License, 2017)<sup>1</sup>.

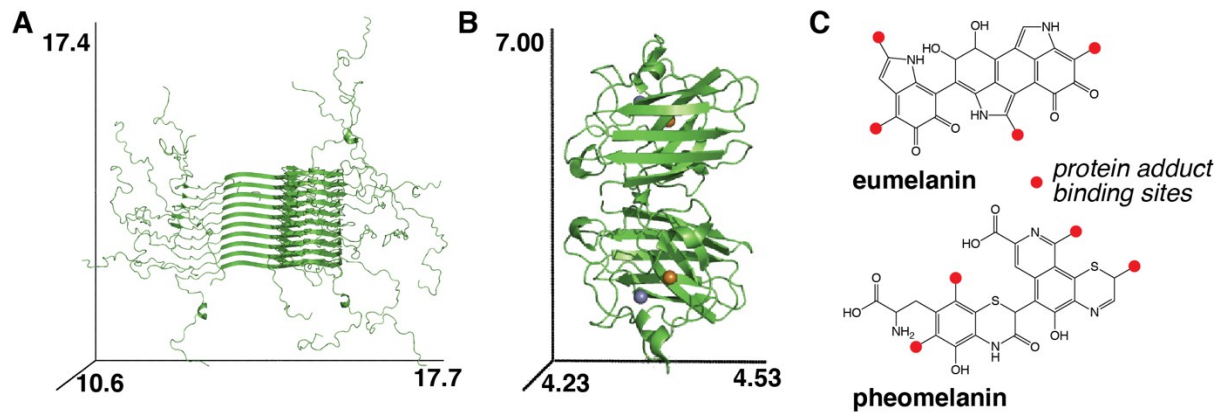

**Supplementary Fig. 3. Structure and dimensions of protein aggregates and neuromelanin**

a) Atomic-resolution structure of pathogenic  $\alpha$ -syn fibrils (PDB ID 2n0a<sup>2</sup>) b) Wild type holoSOD1 homodimer (PDB ID 2v0a<sup>3</sup>). Protein structure and dimensions (nm) determined using PyMOL 2.3.3 (see Methods). c) Chemical structure of eumelanin and pheomelanin subunits of neuromelanin.

## Supplementary Tables

### Supplementary Table 1. Subject demographics

Reported PD cohort characteristics.

| Case ID | Disease duration (y) | Age; onset (y) | Age; death (y) | PMI (h) <sup>[a]</sup> | Sex | Reported cause of death       | Anti-parkinson medications |
|---------|----------------------|----------------|----------------|------------------------|-----|-------------------------------|----------------------------|
| PD1     | 13                   | 71             | 82             | 28                     | M   | Bronchopneumonia, old age; PD | Levodopa                   |
| PD2     | 15                   | 61             | 80             | 29                     | M   | Urosepsis; PD                 | NR <sup>[b]</sup>          |
| PD3     | NR                   | NR             | 81             | 28                     | F   | End-stage PD                  | NR                         |
| PD4     | 5                    | 76             | 84             | 25                     | F   | NR                            | Levodopa                   |
| PD5     | NR                   | NR             | 89             | 54                     | F   | NR                            | NR                         |

<sup>[a]</sup> Post-mortem interval. <sup>[b]</sup> Not reported.

### Supplementary Table 2. APS Bionanoprobe scan identifiers

Sample reference key for Bionanoprobe fly scan data and image identifiers<sup>[a]</sup>.

| Case ID                    | LB scan ID | SOD1 scan ID                           | NM scan ID         |
|----------------------------|------------|----------------------------------------|--------------------|
| PD1                        | 6, 22, 25  | 18 <sup>[b]</sup> , 19, 20, 23, 24, 26 | -                  |
| PD2                        | -          | 45, 46, 78, 80                         | -                  |
| PD3                        | 66, 68, 99 | 63 <sup>[b]</sup> , 64, 96, 98         | 62, 65, 67, 69, 70 |
| PD4                        | 106, 109   | 107, 108, 110                          | -                  |
| PD5                        | -          | 121                                    | 120                |
| <b>Features imaged (n)</b> | 8          | 23                                     | 6                  |

<sup>[a]</sup> In archived (.zip) [Supplementary Data](#) as /fly<scan ID>/. <sup>[b]</sup> Multiple features in single fly scan area.

**Supplementary Table 3. X-ray ptychography and fluorescent emission characteristics of human Parkinson's disease brain tissue**

Limit of detection, sample size, mean, standard error of the mean (SEM), standard deviation (SD) and inter-sample min-max values for Lewy bodies (LB), SOD1 aggregates, neuromelanin (NM) and surrounding neuropil (NP).

| Analyte                   | Limit of detection (ng cm <sup>-2</sup> ) <sup>[a]</sup> | Feature | <i>n</i> | Mean   | SEM   | SD     | Min    | Max    |
|---------------------------|----------------------------------------------------------|---------|----------|--------|-------|--------|--------|--------|
| Area (μm <sup>2</sup> )   | -                                                        | LB      | 8        | 18.82  | 4.55  | 12.04  | 5.97   | 43.05  |
|                           |                                                          | SOD1    | 20       | 35.62  | 4.1   | 16.42  | 2.77   | 58.63  |
|                           |                                                          | NM      | 6        | 159.9  | 31.48 | 77.1   | 69.4   | 271.7  |
| Phase (rad)               | -                                                        | LB      | 8        | -0.69  | 0.02  | 0.05   | 0.75   | 0.61   |
|                           |                                                          | SOD1    | 20       | -0.74  | 0.13  | 0.05   | -0.83  | -0.66  |
|                           |                                                          | NM      | 6        | -0.68  | 0.01  | 0.03   | -0.73  | -0.65  |
|                           |                                                          | NP      | 32       | -0.64  | 0.01  | 0.03   | -0.73  | -0.59  |
| Compton (counts)          | -                                                        | LB      | 8        | 217.51 | 14.48 | 40.95  | 148.94 | 268.27 |
|                           |                                                          | SOD1    | 20       | 237.54 | 13.83 | 60.27  | 183.88 | 408.8  |
|                           |                                                          | NM      | 6        | 190.6  | 6.79  | 16.64  | 168.64 | 216.04 |
|                           |                                                          | NP      | 32       | 203.65 | 11.15 | 63.09  | 132.13 | 400.29 |
| K (ng cm <sup>-2</sup> )  | 66.9                                                     | LB      | 8        | 266.17 | 38.99 | 110.29 | 110.47 | 491.76 |
|                           |                                                          | SOD1    | 20       | 260.21 | 21.05 | 94.16  | 104.01 | 467.93 |
|                           |                                                          | NM      | 6        | 220.95 | 11.3  | 27.68  | 172.84 | 250.26 |
|                           |                                                          | NP      | 32       | 179.52 | 12.72 | 70.83  | 69.71  | 394.21 |
| P (ng cm <sup>-2</sup> )  | 23.4                                                     | LB      | 8        | 40.81  | 2.85  | 7.54   | 27.5   | 49.65  |
|                           |                                                          | SOD1    | 20       | 43.98  | 2.05  | 8.19   | 34.51  | 62.35  |
|                           |                                                          | NM      | 6        | 35.07  | 1.63  | 3.98   | 30.97  | 40.05  |
|                           |                                                          | NP      | 32       | 36.1   | 1.47  | 7.91   | 25.54  | 55.65  |
| S (ng cm <sup>-2</sup> )  | 15.6                                                     | LB      | 8        | 39.39  | 3.42  | 9.06   | 20.67  | 47.87  |
|                           |                                                          | SOD1    | 20       | 49.45  | 3.09  | 12.37  | 33.14  | 82.67  |
|                           |                                                          | NM      | 6        | 51.32  | 5.97  | 14.62  | 29.66  | 70.22  |
|                           |                                                          | NP      | 32       | 34.45  | 1.83  | 9.88   | 17.78  | 61.39  |
| Fe (ng cm <sup>-2</sup> ) | 93.3                                                     | LB      | 8        | 188.56 | 16.05 | 42.48  | 110.38 | 227.56 |
|                           |                                                          | SOD1    | 16       | 188.98 | 12.67 | 50.66  | 120.27 | 276.8  |
|                           |                                                          | NM      | 6        | 166.99 | 6.88  | 16.86  | 147.3  | 187.6  |
|                           |                                                          | NP      | 30       | 141.68 | 5.51  | 29.67  | 92.8   | 236.95 |
| Cu (ng cm <sup>-2</sup> ) | 19.2                                                     | LB      | 8        | 24.2   | 1.63  | 4.32   | 20.76  | 32.92  |
|                           |                                                          | SOD1    | 20       | 25.22  | 0.57  | 2.29   | 22.58  | 30.82  |
|                           |                                                          | NM      | 6        | 26.94  | 1.34  | 3.28   | 24.4   | 31.91  |
|                           |                                                          | NP      | 32       | 23.21  | 0.48  | 2.59   | 20.26  | 32.08  |
| Zn (ng cm <sup>-2</sup> ) | 19.6                                                     | LB      | 8        | 30.49  | 1.69  | 4.47   | 22.49  | 35.43  |
|                           |                                                          | SOD1    | 20       | 33.1   | 1.3   | 5.21   | 26.81  | 43.27  |
|                           |                                                          | NM      | 6        | 34.89  | 2.79  | 6.82   | 28.37  | 47.63  |
|                           |                                                          | NP      | 32       | 27.34  | 0.95  | 5.1    | 20.64  | 42.94  |

<sup>[a]</sup> Limit of detection ( $3\sigma + \text{Si}_3\text{N}_4$  blank) as  $A_{mass}$  (in ng cm<sup>-2</sup>) for measured elements.

## Supplementary References

1. J. Deng, D. J. Vine, S. Chen, Q. Jin, Y. S. G. Nashed, T. Peterka, S. Vogt and C. Jacobsen, *Sci. Rep.*, 2017, **7**, 445.
2. M. D. Tuttle, G. Comellas, A. J. Nieuwkoop, D. J. Covell, D. A. Berthold, K. D. Kloepper, J. M. Courtney, J. K. Kim, A. M. Barclay, A. Kendall, W. Wan, G. Stubbs, C. D. Schwieters, V. M. Y. Lee, J. M. George and C. M. Rienstra, *Nat. Struct. Mol. Biol.*, 2016, **23**, 409-415.
3. R. W. Strange, S. Antonyuk, M. A. Hough, P. A. Doucette, J. A. Rodriguez, P. J. Hart, L. J. Hayward, J. S. Valentine and S. S. Hasnain, *J. Mol. Biol.*, 2003, **328**, 877-891.
